# Supplementary material for: Changes in ontogenetic patterns facilitate diversification in skull shape of Australian agamid lizards
Source: BMC Evol Biol. 2019 Jan 8;19:7. doi: 10.1186/s12862-018-1335-6 (PMC6325775; doi:10.1186/s12862-018-1335-6)
Supplement: Supplementary file 1 — Table S1. Pairwise results for angles in phenotypic trajectory analysis. Upper triangle shows pairwise p-values, while lower triangle shows pairwise angle differences (red highlighted cells indicate p < 0.05). Table S2. Pairwise results for magnitude in phenotypic trajectory analysis. Upper triangle shows pairwise p-values, while lower triangle shows pairwise magnitude differences (red highlighted cells indicate p < 0.05). (XLSX 19 kb) [file 12862_2018_1335_MOESM1_ESM.xlsx]

## Sheet: Sheet1
Table S1. Pairwise results for angles in phenotypic trajectory analysis. Top triangle shows pairwise p-values, while bottom triangle shows pairwise angle differences (red highlighted cells indicate p < 0.05).
	amp_mur	chl_kin	cte_cau	cte_cri	cte_dec	cte_iso	cte_nuc	cte_ret	dip_nob	dip_win	gow_lon	int_les	lop_gil	mol_hor	pog_bar	pog_vit	ran_die	tym_tet
amp_mur		0.013	0.088	0.105	0.628	0.001	0.001	0.001	0.403	0.521	0.453	0.007	0.269	0.001	0.001	0.001	0.056	0.061
chl_kin	56.3897		0.454	0.02	0.309	0.015	0.505	0.133	0.093	0.013	0.004	0.854	0.269	0.036	0.679	0.718	0.21	0.043
cte_cau	38.2889	33.4365		0.049	0.555	0.002	0.26	0.022	0.144	0.098	0.039	0.715	0.443	0.002	0.134	0.409	0.28	0.034
cte_cri	43.1969	59.5474	48.1122		0.365	0.038	0.003	0.001	0.227	0.079	0.069	0.023	0.203	0.005	0.002	0.013	0.027	0.05
cte_dec	33.7718	45.778	35.323	43.7736		0.038	0.082	0.019	0.506	0.421	0.39	0.214	0.568	0.027	0.125	0.204	0.393	0.493
cte_iso	52.962	54.9627	51.8238	48.0891	59.1483		0.001	0.001	0.025	0.031	0.001	0.003	0.177	0.001	0.001	0.001	0.01	0.012
cte_nuc	61.99	33.2203	34.3501	65.0671	54.8341	67.0686		0.84	0.008	0.006	0.001	0.964	0.069	0.006	0.855	0.977	0.065	0.003
cte_ret	73.9753	40.3494	42.5009	71.3795	65.1889	69.9741	22.5075		0.001	0.001	0.001	0.564	0.01	0.009	0.534	0.243	0.014	0.002
dip_nob	36.4906	53.8662	46.0165	47.4325	41.0406	58.9009	71.5635	77.8936		0.467	0.308	0.034	0.124	0.005	0.013	0.017	0.264	0.679
dip_win	35.6435	67.6225	52.764	56.4941	45.885	58.7042	73.14	86.0932	42.5843		0.43	0.011	0.226	0.002	0.001	0.016	0.303	0.204
gow_lon	30.1158	62.8016	44.2424	47.4719	40.9711	65.0184	61.6182	75.0695	41.372	39.0203		0.002	0.187	0.001	0.001	0.002	0.273	0.019
int_les	53.1348	26.3445	25.8461	54.8714	46.6347	55.7302	20.9662	27.8543	59.1908	67.1523	56.0313		0.322	0.011	0.805	0.992	0.111	0.009
lop_gil	35.9032	40.8372	32.5541	43.339	38.0167	38.2396	46.8554	58.3681	50.9633	48.6122	40.9135	37.2813		0.001	0.022	0.275	0.236	0.024
mol_hor	77.5747	58.013	65.3269	71.0906	66.596	76.1411	63.2376	59.4759	77.4979	87.2285	84.9823	62.0731	77.0961		0.003	0.002	0.007	0.031
pog_bar	63.8397	28.4833	35.951	68.9402	50.1162	72.3131	22.9454	26.994	64.1141	74.9368	64.8896	24.244	52.0369	62.8479		0.698	0.032	0.006
pog_vit	53.7456	27.4562	29.1664	55.7702	44.0855	59.3595	18.4701	31.1077	61.5666	66.186	53.2572	15.54	35.8261	66.0855	24.1175		0.119	0.006
ran_die	51.8423	47.1699	39.9425	61.7061	44.9364	61.4497	52.4463	61.2396	47.4102	47.3146	41.4496	48.19	44.5647	70.764	54.8729	46.2001		0.079
tym_tet	50.9411	58.2717	54.4928	58.1049	41.8466	63.0066	75.3323	79.488	36.0284	51.9081	59.2956	66.3414	62.8418	63.7885	66.9328	69.1877	55.9857
Table S2. Pairwise results for magnitude in phenotypic trajectory analysis. Top triangle shows pairwise p-values, while bottom triangle shows pairwise magnitude differences (red highlighted cells indicate p < 0.05).
	amp_mur	chl_kin	cte_cau	cte_cri	cte_dec	cte_iso	cte_nuc	cte_ret	dip_nob	dip_win	gow_lon	int_les	lop_gil	mol_hor	pog_bar	pog_vit	ran_die	tym_tet
amp_mur		0.017	0.75	0.435	0.378	0.006	0.329	0.755	0.622	0.412	0.434	0.01	0.607	0.082	0.001	0.001	0.186	0.503
chl_kin	0.0404757		0.011	0.003	0.26	0.001	0.002	0.035	0.013	0.009	0.004	0.83	0.007	0.534	0.566	0.188	0.003	0.01
cte_cau	0.00462521	0.0451009		0.637	0.271	0.012	0.555	0.534	0.83	0.566	0.639	0.006	0.85	0.055	0.001	0.001	0.29	0.704
cte_cri	0.0125293	0.053005	0.00790406		0.14	0.092	0.924	0.294	0.833	0.884	0.945	0.001	0.801	0.031	0.001	0.001	0.547	0.969
cte_dec	0.0171619	0.0233138	0.0217871	0.0296911		0.007	0.114	0.53	0.2	0.156	0.161	0.32	0.234	0.53	0.121	0.038	0.053	0.171
cte_iso	0.040864	0.0813397	0.0362388	0.0283347	0.0580259		0.064	0.003	0.086	0.186	0.044	0.001	0.031	0.001	0.001	0.001	0.348	0.093
cte_nuc	0.0139518	0.0544275	0.00932655	0.00142249	0.0311136	0.0269122		0.209	0.751	0.945	0.87	0.002	0.692	0.017	0.001	0.001	0.591	0.9
cte_ret	0.0043076	0.0361681	0.00893281	0.0168369	0.0128543	0.0451716	0.0182594		0.458	0.289	0.254	0.028	0.443	0.151	0.001	0.001	0.124	0.363
dip_nob	0.00862724	0.049103	0.00400203	0.00390203	0.0257891	0.0322367	0.00532452	0.0129348		0.741	0.889	0.016	0.966	0.059	0.005	0.001	0.461	0.883
dip_win	0.0155127	0.0559884	0.0108875	0.00298339	0.0326745	0.0253513	0.00156091	0.0198203	0.00688542		0.824	0.01	0.696	0.03	0.004	0.001	0.679	0.846
gow_lon	0.0115511	0.0520268	0.00692589	0.000978169	0.028713	0.0293129	0.00240066	0.0158587	0.00292386	0.00396156		0.001	0.816	0.027	0.001	0.001	0.48	0.994
int_les	0.036894	0.00358173	0.0415192	0.0494233	0.0197321	0.077758	0.0508458	0.0325864	0.0455212	0.0524067	0.0484451		0.005	0.682	0.42	0.09	0.005	0.008
lop_gil	0.00783648	0.0483122	0.00321128	0.00469279	0.0249984	0.0330275	0.00611528	0.0121441	0.000790758	0.00767618	0.00371462	0.0447305		0.038	0.001	0.001	0.39	0.834
mol_hor	0.0301839	0.0102918	0.0348091	0.0427131	0.013022	0.0710479	0.0441356	0.0258763	0.0388111	0.0456965	0.041735	0.00671012	0.0380204		0.299	0.083	0.008	0.038
pog_bar	0.0493527	0.00887695	0.0539779	0.0618819	0.0321908	0.0902167	0.0633044	0.0450451	0.0579799	0.0648653	0.0609038	0.0124587	0.0571892	0.0191688		0.376	0.002	0.002
pog_vit	0.0616223	0.0211465	0.0662475	0.0741515	0.0444604	0.102486	0.075574	0.0573147	0.0702495	0.0771349	0.0731734	0.0247283	0.0694587	0.0314384	0.0122696		0.001	0.001
ran_die	0.0240137	0.0644895	0.0193885	0.0114845	0.0411756	0.0168502	0.010062	0.0283214	0.0153865	0.00850108	0.0124626	0.0609077	0.0161773	0.0541976	0.0733664	0.085636		0.54
tym_tet	0.0116768	0.0521526	0.00705164	0.000852421	0.0288387	0.0291871	0.00227491	0.0159845	0.00304961	0.00383582	0.000125748	0.0485708	0.00384037	0.0418607	0.0610295	0.0732991	0.0123369
